# Supplementary material for: PCl3–C6H6 heterodimers: evidence for P⋯π phosphorus bonding at low temperatures
Source: Royal Society of Chemistry journal article supplement (doi:10.1039/c6cp03825e), 2016-01-01

## PCl<sub>3</sub>-C<sub>6</sub>H<sub>6</sub> heterodimer: Evidence for P... $\pi$ phosphorus bonding at low temperatures

N. Ramanathan, K. Sankaran and K. Sundararajan\*

Chemistry Group, Indira Gandhi Center for Atomic Research,  
Kalpakkam - 603102, Tamil Nadu, India

### Electronic Supplementary Information

**Table S1. Thermodynamics of formation of various PCl<sub>3</sub>-Benzene heterodimers**

| Dimer     | Thermodynamic parameters |                       |                         |                       |
|-----------|--------------------------|-----------------------|-------------------------|-----------------------|
|           | $\Delta E$ (kcal/mol)    | $\Delta H$ (kcal/mol) | $\Delta S$ (kcal/mol/k) | $\Delta G$ (kcal/mol) |
| Dimer-I   | -9.87                    | -9.97                 | -0.031                  | -8.41                 |
| Dimer-II  | -7.67                    | -7.77                 | -0.032                  | -6.19                 |
| Dimer-III | -6.05                    | -6.15                 | -0.032                  | -4.57                 |
| Dimer-IV  | -4.52                    | -4.61                 | -0.028                  | -3.19                 |

Table S2. The structures of  $\text{PCl}_3$ -Benzene heterodimers along with its ZPE corrected relative energies (kcal/mol) calculated at MP2/6-311++G(d,p) level of theory.

| Structure of the adduct                                                                                                   | Relative energy (kcal/mol) |
|---------------------------------------------------------------------------------------------------------------------------|----------------------------|
| 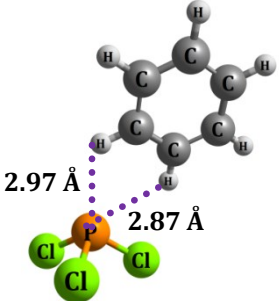 <p style="text-align: center;">V</p>    | 6.77                       |
|  <p style="text-align: center;">IV</p>   | 5.06                       |
|  <p style="text-align: center;">III</p> | 2.88                       |
|  <p style="text-align: center;">II</p> | 1.96                       |
|  <p style="text-align: center;">I</p>  | 0.00                       |

Table S3. The structures of  $\text{PCl}_3$ -Benzene heterodimers along with its relative energies (kcal/mol) calculated at dispersion corrected B3LYP/aug-cc-pVDZ level of theory.

| Structure of the adduct                                                                                                 | Relative energy (kcal/mol) |
|-------------------------------------------------------------------------------------------------------------------------|----------------------------|
| 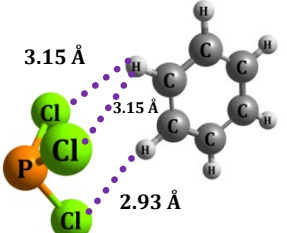 <p style="text-align: right;">IV</p>  | 2.38                       |
|  <p style="text-align: right;">III</p> | 1.73                       |
|  <p style="text-align: right;">II</p> | 0.88                       |
|  <p style="text-align: right;">I</p> | 0.00                       |

Table S4. The structures of  $\text{PCl}_3$ -Benzene heterodimers along with its ZPE corrected relative energies (kcal/mol) calculated at dispersion corrected B3LYP/6-311++G(d,p) level of theory

| Structure of the adduct                                                                                                  | Relative energy (kcal/mol) |
|--------------------------------------------------------------------------------------------------------------------------|----------------------------|
| 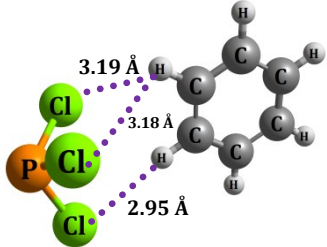 <p style="text-align: right;">IV</p>   | 3.24                       |
|  <p style="text-align: right;">III</p>  | 1.72                       |
|  <p style="text-align: right;">II</p> | 0.91                       |
|  <p style="text-align: right;">I</p>  | 0.00                       |

**Table S5. Computed and experimental vibrational wavenumbers, shifts in the wavenumbers and mode assignments for PCl<sub>3</sub>-C<sub>6</sub>H<sub>6</sub> heterodimers calculated at MP2/aug-CC-pVDZ level of theory.**

| Vibrational wavenumbers $\nu$ (cm <sup>-1</sup> ) |                                   |                                                   | Vibrational mode assignments                                                                                                            |
|---------------------------------------------------|-----------------------------------|---------------------------------------------------|-----------------------------------------------------------------------------------------------------------------------------------------|
| Computed <sup>a</sup>                             | Shift with respect to the monomer | Experimental <sup>b</sup> (N <sub>2</sub> Matrix) |                                                                                                                                         |
| <b>PCl<sub>3</sub> Region</b>                     |                                   |                                                   |                                                                                                                                         |
| 492.0 (146)                                       | ---                               | 496.6                                             | $\nu_3$ (P-Cl stretching, e) <sup>c</sup> in PCl <sub>3</sub>                                                                           |
| 474.5 (150)<br>474.6 (116)                        | -17.5<br>-17.4                    | 488.9 (-7.7)<br>487.0 (-7.2)<br>483.6 (-8.7)      | P-Cl stretching in PCl <sub>3</sub> sub-molecule of PCl <sub>3</sub> -C <sub>6</sub> H <sub>6</sub> dimer- <b>I</b>                     |
| 476.9 (187)<br>480.6 (121)                        | -15.1<br>-11.4                    | - <sup>d</sup>                                    | P-Cl stretching in PCl <sub>3</sub> sub-molecule of PCl <sub>3</sub> -C <sub>6</sub> H <sub>6</sub> dimer- <b>II</b>                    |
| 483.2 (120)<br>491.2 (104)                        | -8.8<br>-0.8                      | - <sup>d</sup>                                    | P-Cl stretching in PCl <sub>3</sub> sub-molecule of PCl <sub>3</sub> -C <sub>6</sub> H <sub>6</sub> dimer- <b>III</b>                   |
| 487.5 (124)<br>490.5 (117)                        | -4.5<br>-1.5                      | - <sup>d</sup>                                    | P-Cl stretching in PCl <sub>3</sub> sub-molecule of PCl <sub>3</sub> -C <sub>6</sub> H <sub>6</sub> dimer- <b>IV</b>                    |
| <b>Benzene Region</b>                             |                                   |                                                   |                                                                                                                                         |
| 678.3 (116)                                       | ---                               | 678.4                                             | $\nu_4$ out-of-plane bending of C <sub>6</sub> H <sub>6</sub>                                                                           |
| 686.6 (133)                                       | +8.3                              | 683.8 (+5.4)                                      | out-of-plane bending in C <sub>6</sub> H <sub>6</sub> sub-molecule of PCl <sub>3</sub> -C <sub>6</sub> H <sub>6</sub> dimer- <b>I</b>   |
| 681.4 (130)                                       | +3.1                              | - <sup>d</sup>                                    | out-of-plane bending in C <sub>6</sub> H <sub>6</sub> sub-molecule of PCl <sub>3</sub> -C <sub>6</sub> H <sub>6</sub> dimer- <b>II</b>  |
| 673.4 (128)                                       | -4.9                              | - <sup>d</sup>                                    | out-of-plane bending in C <sub>6</sub> H <sub>6</sub> sub-molecule of PCl <sub>3</sub> -C <sub>6</sub> H <sub>6</sub> dimer- <b>III</b> |
| 682.1 (100)                                       | +3.8                              | - <sup>d</sup>                                    | out-of-plane bending in C <sub>6</sub> H <sub>6</sub> sub-molecule of PCl <sub>3</sub> -C <sub>6</sub> H <sub>6</sub> dimer- <b>IV</b>  |
| 680.8 (81)<br>685.2 (139)                         | +2.5<br>+6.9                      | 679.8 (+1.4)<br>681.8 (+3.4)                      | out-of-plane bending in C <sub>6</sub> H <sub>6</sub> sub-molecule of C <sub>6</sub> H <sub>6</sub> dimer                               |

<sup>a</sup> Intensities in km/mol given in parenthesis.

<sup>b</sup> Experimental shift with respect to the monomer given in parenthesis.

<sup>c</sup> P-Cl doubly degenerate vibrational stretching wavenumber.

<sup>d</sup> Features were not observed experimentally.

**Table S6. Computed and experimental vibrational wavenumbers, shifts in the wavenumbers and mode assignments for  $\text{PCl}_3\text{-C}_6\text{H}_6$  heterodimers calculated at dispersion corrected B3LYP/aug-CC-pVDZ level of theory.**

| Vibrational wavenumber $\nu$ ( $\text{cm}^{-1}$ ) |                                   |                                                  | Vibrational mode assignments                                                                                         |
|---------------------------------------------------|-----------------------------------|--------------------------------------------------|----------------------------------------------------------------------------------------------------------------------|
| Computed <sup>a</sup>                             | Shift with respect to the monomer | Experimental <sup>b</sup> ( $\text{N}_2$ Matrix) |                                                                                                                      |
| <b><math>\text{PCl}_3</math> Region</b>           |                                   |                                                  |                                                                                                                      |
| 464.1 (146)                                       | ---                               | 496.6                                            | $\nu_3$ (P-Cl stretching, e) <sup>c</sup> in $\text{PCl}_3$                                                          |
| 453.7 (151)                                       | -10.4                             | 488.9 (-7.7)                                     | P-Cl stretching in $\text{PCl}_3$ sub-molecule of $\text{PCl}_3\text{-C}_6\text{H}_6$ dimer- <b>I</b>                |
| 454.4 (118)                                       | -9.7                              | 487.0 (-7.2)                                     |                                                                                                                      |
|                                                   |                                   | 483.6 (-8.7)                                     |                                                                                                                      |
| 453.1 (176)                                       | -11.0                             | - <sup>d</sup>                                   | P-Cl stretching in $\text{PCl}_3$ sub-molecule of $\text{PCl}_3\text{-C}_6\text{H}_6$ dimer- <b>II</b>               |
| 462.5 (133)                                       | -1.6                              |                                                  |                                                                                                                      |
| 457.1 (120)                                       | -7.0                              | - <sup>d</sup>                                   | P-Cl stretching in $\text{PCl}_3$ sub-molecule of $\text{PCl}_3\text{-C}_6\text{H}_6$ dimer- <b>III</b>              |
| 466.6 (109)                                       | +2.5                              |                                                  |                                                                                                                      |
| 461.6 (126)                                       | -2.5                              | - <sup>d</sup>                                   | P-Cl stretching in $\text{PCl}_3$ sub-molecule of $\text{PCl}_3\text{-C}_6\text{H}_6$ dimer- <b>IV</b>               |
| 464.7 (118)                                       | +0.6                              |                                                  |                                                                                                                      |
| <b>Benzene Region</b>                             |                                   |                                                  |                                                                                                                      |
| 680.9 (113)                                       | ---                               | 678.4                                            | $\nu_4$ out-of-plane bending of $\text{C}_6\text{H}_6$                                                               |
| 683.5 (130)                                       | +2.6                              | 683.8 (+5.4)                                     | out-of-plane bending in $\text{C}_6\text{H}_6$ sub-molecule of $\text{PCl}_3\text{-C}_6\text{H}_6$ dimer- <b>I</b>   |
| 681.8 (130)                                       | +0.9                              | - <sup>d</sup>                                   | out-of-plane bending in $\text{C}_6\text{H}_6$ sub-molecule of $\text{PCl}_3\text{-C}_6\text{H}_6$ dimer- <b>II</b>  |
| 675.8 (125)                                       | -5.1                              | - <sup>d</sup>                                   | out-of-plane bending in $\text{C}_6\text{H}_6$ sub-molecule of $\text{PCl}_3\text{-C}_6\text{H}_6$ dimer- <b>III</b> |
| 682.9 (97)                                        | +2.0                              | - <sup>d</sup>                                   | out-of-plane bending in $\text{C}_6\text{H}_6$ sub-molecule of $\text{PCl}_3\text{-C}_6\text{H}_6$ dimer- <b>IV</b>  |

<sup>a</sup> Intensities in  $\text{km/mol}$  given in parenthesis.

<sup>b</sup> Experimental shift with respect to the monomer given in parenthesis.

<sup>c</sup> P-Cl doubly degenerate vibrational stretching wavenumber.

<sup>d</sup> Features were not observed experimentally.

**Table S7. The structure of (C<sub>6</sub>H<sub>6</sub>)<sub>2</sub> homodimer and interaction energy (kcal/mol) calculated at MP2/aug-cc-pVDZ level of theory**

| Structure of the (C <sub>6</sub> H <sub>6</sub> ) <sub>2</sub> homodimer          | Binding energy (ZPE/BSSE corrected) (kcal/mol) |
|-----------------------------------------------------------------------------------|------------------------------------------------|
| 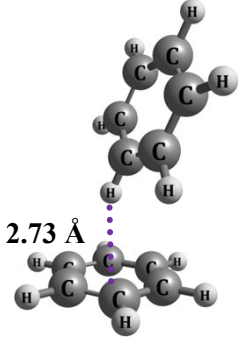 | -6.02/-2.42                                    |

**Fig S1. The AIM structure of C<sub>6</sub>H<sub>6</sub>-HCl dimer calculated at MP2/aug-cc-pVDZ level of theory**

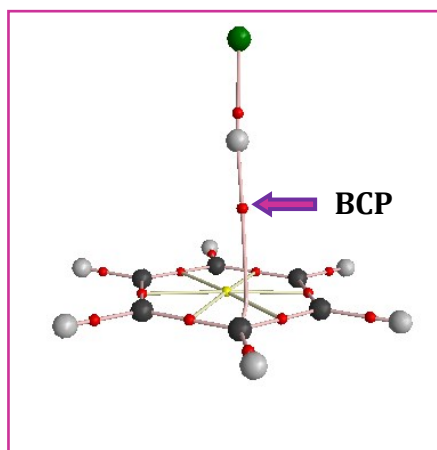

Supplement: c6cp03825e1.pdf [file c6cp03825e1.pdf]
